# Supplementary material for: Ibrutinib Modulates Proliferation, Migration, Mitochondrial Homeostasis, and Apoptosis in Melanoma Cells
Source: MDPI journal article supplement (doi:10.3390/biomedicines12051012), 2024-05-04
Supplement: s1 [file s1]

## Supplementary Materials

**Supplementary Table S1.** Primer sequences used in real-time PCR.

| Gene         | Primer  | Sequence (5'- 3')           |
|--------------|---------|-----------------------------|
| <i>GAPDH</i> | Foward  | TCAACGACCACTTTGTCAAGCTCAGCT |
|              | Reverse | GGTGGTCCAGGGGTCTTAC         |
| <i>ATM</i>   | Foward  | GCACAGAAGTGCCTCCAATTC       |
|              | Reverse | ACATTCTGGCACGCTTTGG         |
| <i>BAX</i>   | Foward  | CAGACCGTGACCATCTTTGT        |
|              | Reverse | GCCTCAGCCCATCTTCTTC         |
| <i>BAK</i>   | Foward  | GTTTTCCGCAGCTACGTTTTT       |
|              | Reverse | GCAGAGGTAAGGTGACCATCTC      |
| <i>BTK</i>   | Foward  | TCTGAAGCGATCCCAACAGAA       |
|              | Reverse | TGCACGGTCAAGAGAAACAGG       |
| <i>CASP3</i> | Foward  | CTAGCGGATGGGTGCTATTG        |
|              | Reverse | GATACACAGCCACAGGTATGAG      |
| <i>CASP8</i> | Foward  | GGATGGCCACTGTGAATAACTG      |
|              | Reverse | TCGAGGACATCGCTCTCTCA        |
| <i>EGFR</i>  | Foward  | TTCAGGAGCTGTACGTGCATT       |
|              | Reverse | CACAAGCGCTGTGTACCCT         |
| <i>ERBB2</i> | Foward  | CGGGGTTCCCTTCCCCTAATG       |
|              | Reverse | CCGAACATCTGGCTGGTTCA        |
| <i>HRK</i>   | Foward  | AGGTTGGTGAAAACCCTGTG        |
|              | Reverse | GCATTGGGGTGTCTGTTTCT        |
| <i>ITK</i>   | Foward  | GATCAACTGCCTCCACATTGC       |
|              | Reverse | GGGCATCACCTCTTAGCACA        |
| <i>JAK3</i>  | Foward  | GCCTGGAGTGGCATGAGAA         |
|              | Reverse | CCCCGGTAAATCTTGGTGAA        |

**Supplementary Table S2.** Top 20 upregulated genes in low vs. high *BTK* expression.

| Gene    | Log2 Ratio | p-Value  | q-Value  |
|---------|------------|----------|----------|
| BTK     | -2.02      | 8.49E-25 | 1.77E-20 |
| CD86    | -1.45      | 2.87E-14 | 2.99E-10 |
| CD84    | -1.78      | 7.33E-14 | 4.80E-10 |
| DOCK2   | -1.66      | 1.02E-13 | 4.80E-10 |
| SPI1    | -1.49      | 1.15E-13 | 4.80E-10 |
| IL10    | -1.27      | 2.52E-13 | 8.72E-10 |
| SLC7A7  | -1.51      | 5.96E-13 | 1.50E-09 |
| MS4A4A  | -1.52      | 6.08E-13 | 1.50E-09 |
| LY75    | -1.39      | 6.47E-13 | 1.50E-09 |
| CYBB    | -1.97      | 8.38E-13 | 1.74E-09 |
| C3AR1   | -1.34      | 9.89E-13 | 1.87E-09 |
| HLA-DMA | -1.81      | 1.38E-12 | 2.39E-09 |
| MNDA    | -1.53      | 1.49E-12 | 2.39E-09 |
| CTSS    | -1.79      | 1.66E-12 | 2.41E-09 |
| CD180   | -1.34      | 1.74E-12 | 2.41E-09 |
| MPEG1   | -1.47      | 1.85E-12 | 2.41E-09 |
| TLR7    | -1.2       | 3.22E-12 | 3.95E-09 |
| HLA-DMB | -1.66      | 4.29E-12 | 4.76E-09 |
| CR1     | -1.59      | 4.35E-12 | 4.76E-09 |
| TFEC    | -1.5       | 4.75E-12 | 4.94E-09 |

**Supplementary Table S3.** Top 20 downregulated genes in low vs. high *BTK* expression.

| Gene      | Log2 Ratio | p-Value  | q-Value  |
|-----------|------------|----------|----------|
| SLC37A3   | 0.62       | 5.67E-05 | 1.65E-03 |
| DBNDD1    | 0.76       | 6.27E-05 | 1.79E-03 |
| KPTN      | 0.58       | 1.46E-04 | 3.53E-03 |
| AHCY      | 0.55       | 3.85E-04 | 7.74E-03 |
| PRR7      | 0.53       | 4.28E-04 | 8.36E-03 |
| MAP1LC3A  | 0.77       | 4.44E-04 | 8.62E-03 |
| LINC00473 | 0.84       | 7.82E-04 | 0.0135   |
| ZBED3     | 0.18       | 8.03E-04 | 0.0138   |
| CBX3      | 0.42       | 1.17E-03 | 0.0184   |
| NT5M      | 0.46       | 1.19E-03 | 0.0186   |
| PDXP      | 0.41       | 1.21E-03 | 0.019    |
| LOH12CR2  | 0.12       | 1.30E-03 | 0.0201   |
| GP1BB     | 0.67       | 1.31E-03 | 0.0201   |
| GAPDH     | 0.45       | 1.32E-03 | 0.0202   |
| VPS37D    | 0.28       | 1.39E-03 | 0.021    |
| DLGAP1    | 0.88       | 1.40E-03 | 0.0211   |
| PROSER2   | 0.51       | 1.43E-03 | 0.0214   |
| LRATD2    | 0.32       | 1.75E-03 | 0.0251   |
| VLDLR     | 0.73       | 1.80E-03 | 0.0257   |
| BUD23     | 0.46       | 1.83E-03 | 0.026    |

**Supplementary Table S4.** Top 20 upregulated genes in low vs. high *EGFR* expression.

| Gene   | Log2 Ratio | p-Value  | q-Value  |
|--------|------------|----------|----------|
| EGFR   | -2.54      | 3.05E-29 | 6.34E-25 |
| LAMA3  | -2.04      | 3.55E-15 | 3.70E-11 |
| MPP7   | -1.75      | 2.12E-14 | 1.20E-10 |
| EPHB6  | -2.05      | 2.31E-14 | 1.20E-10 |
| PLAC9  | -1.66      | 5.63E-14 | 2.34E-10 |
| CGNL1  | -1.53      | 6.82E-14 | 2.36E-10 |
| MFAP4  | -1.83      | 2.43E-13 | 7.21E-10 |
| FGD5   | -1.35      | 2.97E-13 | 7.73E-10 |
| CLU    | -2.63      | 9.02E-13 | 2.09E-09 |
| LAMA2  | -1.84      | 1.34E-12 | 2.80E-09 |
| SPNS2  | -1.04      | 2.00E-12 | 3.78E-09 |
| CXCL14 | -2.27      | 2.22E-12 | 3.84E-09 |
| TEK    | -1.11      | 3.49E-12 | 5.36E-09 |
| CLEC3B | -2.13      | 3.61E-12 | 5.36E-09 |
| TNXB   | -2.34      | 4.21E-12 | 5.84E-09 |
| SH3RF2 | -1.95      | 4.54E-12 | 5.91E-09 |
| ACKR1  | -1.53      | 5.16E-12 | 6.32E-09 |
| TPSAB1 | -2.26      | 6.10E-12 | 7.05E-09 |
| SCARA3 | -1.52      | 7.29E-12 | 7.99E-09 |
| ELN    | -2.33      | 8.91E-12 | 9.27E-09 |

**Supplementary Table S5.** Top 20 downregulated genes in low vs. high *EGFR* expression.

| Gene      | Log2 Ratio | p-Value  | q-Value  |
|-----------|------------|----------|----------|
| RABGGTB   | 0.41       | 5.65E-04 | 6.84E-03 |
| PKLR      | 0.62       | 8.65E-04 | 9.49E-03 |
| LIN28B    | 0.32       | 1.28E-03 | 0.0128   |
| HSD3BP5   | 0.63       | 1.33E-03 | 0.0132   |
| NPM1      | 0.44       | 1.43E-03 | 0.0139   |
| TBCE      | 0.39       | 1.60E-03 | 0.0152   |
| TNNI3     | 0.5        | 1.74E-03 | 0.0162   |
| CBX3      | 0.41       | 1.78E-03 | 0.0165   |
| TOMM20P4  | 0.32       | 1.79E-03 | 0.0165   |
| RIOX1     | 0.72       | 1.85E-03 | 0.0169   |
| WNK4      | 1.15       | 1.85E-03 | 0.0169   |
| ERVV-1    | 0.61       | 2.20E-03 | 0.0193   |
| NPM1P24   | 0.4        | 2.28E-03 | 0.0199   |
| ST13      | 0.36       | 2.29E-03 | 0.0199   |
| ZNF695    | 0.5        | 2.30E-03 | 0.02     |
| HSP90AB3P | 0.37       | 2.38E-03 | 0.0204   |
| LDHBP2    | 0.09       | 2.45E-03 | 0.0209   |
| MTFP1     | 0.62       | 2.49E-03 | 0.0211   |
| MTATP6P1  | 0.63       | 3.18E-03 | 0.0253   |
| CPN1      | 1.03       | 3.84E-03 | 0.0292   |

**Supplementary Table S6.** Top 20 upregulated genes in low vs. high *ERBB2* expression.

| Gene    | Log2 Ratio | p-Value  | q-Value  |
|---------|------------|----------|----------|
| ERBB2   | -1.69      | 2.53E-20 | 5.25E-16 |
| MRI1    | -0.8       | 3.07E-09 | 3.19E-05 |
| ZSWIM4  | -0.76      | 7.03E-09 | 3.35E-05 |
| IMPA2   | -1.23      | 7.25E-09 | 3.35E-05 |
| PPM1M   | -1.18      | 8.05E-09 | 3.35E-05 |
| H6PD    | -0.97      | 1.42E-08 | 4.75E-05 |
| ZNF446  | -0.65      | 1.64E-08 | 4.75E-05 |
| FES     | -1.12      | 1.83E-08 | 4.75E-05 |
| SOWAHC  | -0.5       | 2.52E-08 | 5.82E-05 |
| HNRNPA0 | -0.81      | 3.18E-08 | 6.62E-05 |
| JDP2    | -0.96      | 5.07E-08 | 8.59E-05 |
| RABEP2  | -0.87      | 5.52E-08 | 8.59E-05 |
| PLCD1   | -0.97      | 5.53E-08 | 8.59E-05 |
| CASKIN2 | -0.67      | 6.15E-08 | 8.59E-05 |
| PKD1    | -0.9       | 6.42E-08 | 8.59E-05 |
| PALD1   | -0.9       | 7.53E-08 | 8.59E-05 |
| MYO15B  | -1.31      | 7.95E-08 | 8.59E-05 |
| LTB4R2  | -1.01      | 8.50E-08 | 8.59E-05 |
| RHOB    | -1.07      | 8.78E-08 | 8.59E-05 |
| P4HTM   | -1.11      | 9.63E-08 | 8.59E-05 |

**Supplementary Table S7.** Top 20 downregulated genes in low vs. high *ERBB2* expression.

| Gene     | Log2 Ratio | p-Value  | q-Value  |
|----------|------------|----------|----------|
| TRAM1    | 0.59       | 3.97E-05 | 1.99E-03 |
| UQCRB    | 0.62       | 1.02E-04 | 3.31E-03 |
| FTH1P5   | 0.45       | 2.10E-04 | 5.04E-03 |
| WBP11    | 0.5        | 2.72E-04 | 5.85E-03 |
| RPS24P8  | 0.76       | 3.03E-04 | 6.26E-03 |
| TEX15    | 0.75       | 3.32E-04 | 6.63E-03 |
| FTH1     | 0.52       | 3.46E-04 | 6.82E-03 |
| RPL5P34  | 0.42       | 3.64E-04 | 7.05E-03 |
| RPL35P5  | 0.56       | 5.14E-04 | 8.73E-03 |
| GPR19    | 0.6        | 6.57E-04 | 9.94E-03 |
| FTH1P8   | 0.67       | 6.69E-04 | 0.01     |
| GAPDHP63 | 0.29       | 7.03E-04 | 0.0103   |
| TMEM68   | 0.67       | 8.00E-04 | 0.0111   |
| TMCO1    | 0.42       | 8.39E-04 | 0.0114   |
| CSTB     | 0.57       | 1.03E-03 | 0.0129   |
| NT5C3A   | 0.51       | 1.16E-03 | 0.014    |
| ZCCHC9   | 0.43       | 1.27E-03 | 0.0148   |
| MAGOHB   | 0.43       | 1.30E-03 | 0.015    |
| MMGT1    | 0.39       | 1.31E-03 | 0.0151   |
| SEC11C   | 0.55       | 1.34E-03 | 0.0153   |

**Supplementary Table S8.** Top 20 upregulated genes in low vs. high *ITK* expression.

| Gene   | Log2 Ratio | p-Value  | q-Value  |
|--------|------------|----------|----------|
| ITK    | -2.56      | 2.59E-28 | 5.38E-24 |
| CD3E   | -2.39      | 1.38E-20 | 1.43E-16 |
| CD6    | -2.05      | 4.08E-20 | 2.83E-16 |
| GZMA   | -2.21      | 5.24E-19 | 2.73E-15 |
| TAGAP  | -1.7       | 1.09E-18 | 4.52E-15 |
| IL2RG  | -2.12      | 3.22E-18 | 1.12E-14 |
| CORO1A | -2.1       | 4.46E-18 | 1.33E-14 |
| BIN2   | -1.74      | 6.04E-18 | 1.57E-14 |
| IKZF3  | -1.98      | 7.63E-18 | 1.76E-14 |
| IKZF1  | -1.86      | 1.44E-17 | 2.94E-14 |
| CD96   | -2.03      | 1.56E-17 | 2.94E-14 |
| SPN    | -1.71      | 1.80E-17 | 3.12E-14 |
| CYTIP  | -2.02      | 2.32E-17 | 3.72E-14 |
| ITGAL  | -2.52      | 2.62E-17 | 3.85E-14 |
| WDFY4  | -1.83      | 2.78E-17 | 3.85E-14 |
| PTPN7  | -1.93      | 4.05E-17 | 5.27E-14 |
| TRBC2  | -2.63      | 5.81E-17 | 7.11E-14 |
| CD3D   | -2.42      | 8.26E-17 | 9.39E-14 |
| CD2    | -2.14      | 8.57E-17 | 9.39E-14 |
| TESPA1 | -1.55      | 9.33E-17 | 9.71E-14 |



**Supplementary Table S9.** Top 20 downregulated genes in low vs. high *ITK* expression.

| Gene     | Log2 Ratio | p-Value  | q-Value  |
|----------|------------|----------|----------|
| ALX1     | 1.09       | 5.35E-06 | 1.20E-04 |
| PEG10    | 1.28       | 2.57E-05 | 4.68E-04 |
| SPATA17  | 0.75       | 5.22E-05 | 8.62E-04 |
| CHD1L    | 0.43       | 1.51E-04 | 2.19E-03 |
| NELL1    | 1.8        | 1.76E-04 | 2.48E-03 |
| COLGALT2 | 0.83       | 1.92E-04 | 2.68E-03 |
| SAMD13   | 0.8        | 1.94E-04 | 2.71E-03 |
| FDFT1    | 0.63       | 2.43E-04 | 3.26E-03 |
| HIBCH    | 0.7        | 2.78E-04 | 3.66E-03 |
| TRIM51   | 1.1        | 4.14E-04 | 5.13E-03 |
| TRIM51HP | 0.28       | 5.12E-04 | 6.10E-03 |
| DMRTA1   | 0.71       | 5.91E-04 | 6.87E-03 |
| ZNF106   | 0.7        | 9.28E-04 | 0.01     |
| BFSP1    | 0.63       | 1.10E-03 | 0.0115   |
| TMEM98   | 0.83       | 1.19E-03 | 0.0123   |
| AGMO     | 1.11       | 1.26E-03 | 0.0128   |
| SDCBP    | 0.65       | 1.27E-03 | 0.0129   |
| SGK3     | 0.79       | 1.44E-03 | 0.0143   |
| B3GALT1  | 0.59       | 1.74E-03 | 0.0167   |
| AP3M2    | 0.47       | 1.93E-03 | 0.0182   |

**Supplementary Table S10.** Top 20 upregulated genes in low vs. high *JAK3* expression.

| Gene     | Log2 Ratio | p-Value  | q-Value  |
|----------|------------|----------|----------|
| JAK3     | -1.96      | 1.27E-28 | 2.64E-24 |
| LCK      | -1.84      | 2.65E-15 | 1.83E-11 |
| ACAP1    | -1.92      | 2.95E-15 | 1.83E-11 |
| SPOCK2   | -1.7       | 4.19E-15 | 1.83E-11 |
| RASAL3   | -1.42      | 4.39E-15 | 1.83E-11 |
| PSD4     | -1.58      | 7.32E-15 | 2.54E-11 |
| CD27     | -1.73      | 4.11E-14 | 1.05E-10 |
| CCDC88B  | -1.45      | 4.33E-14 | 1.05E-10 |
| CARD11   | -1.23      | 4.56E-14 | 1.05E-10 |
| FCHO1    | -1.32      | 6.75E-14 | 1.35E-10 |
| SH2D1A   | -1.68      | 7.15E-14 | 1.35E-10 |
| ATP2A3   | -1.76      | 1.34E-13 | 2.33E-10 |
| CD3E     | -1.99      | 3.85E-13 | 6.14E-10 |
| GIMAP6   | -1.35      | 4.14E-13 | 6.14E-10 |
| IL21R    | -1.29      | 4.70E-13 | 6.14E-10 |
| ABI3     | -1.33      | 4.72E-13 | 6.14E-10 |
| ARHGAP9  | -1.65      | 6.49E-13 | 7.95E-10 |
| KIF21B   | -1.07      | 8.07E-13 | 8.79E-10 |
| CD6      | -1.7       | 8.41E-13 | 8.79E-10 |
| TBC1D10C | -1.44      | 8.59E-13 | 8.79E-10 |

**Supplementary Table S11.** Top 20 downregulated genes in low vs. high *JAK3* expression.

| Gene      | Log2 Ratio | p-Value  | q-Value  |
|-----------|------------|----------|----------|
| LINC00518 | 1.32       | 2.30E-05 | 4.71E-04 |
| SLC24A5   | 1.49       | 6.39E-05 | 1.09E-03 |
| SAMD13    | 0.85       | 7.41E-05 | 1.23E-03 |
| ALX1      | 0.95       | 8.60E-05 | 1.39E-03 |
| HIBCH     | 0.74       | 1.13E-04 | 1.72E-03 |
| C2CD6     | 0.87       | 1.16E-04 | 1.76E-03 |
| IGSF11    | 1.08       | 3.63E-04 | 4.34E-03 |
| STK32A    | 1.17       | 4.67E-04 | 5.30E-03 |
| PRKD3     | 0.7        | 6.02E-04 | 6.47E-03 |
| FXR1      | 0.38       | 6.12E-04 | 6.55E-03 |
| TDRD3     | 0.89       | 6.26E-04 | 6.69E-03 |
| FAM161A   | 0.65       | 6.38E-04 | 6.79E-03 |
| IFTAP     | 0.57       | 8.20E-04 | 8.25E-03 |
| TEX30     | 0.54       | 8.91E-04 | 8.77E-03 |
| COLGALT2  | 0.75       | 9.13E-04 | 8.94E-03 |
| B3GALT1   | 0.61       | 9.92E-04 | 9.52E-03 |
| MYEF2     | 0.68       | 1.06E-03 | 9.98E-03 |
| TMEM106B  | 0.34       | 1.07E-03 | 0.0101   |
| MT-ND3    | 0.93       | 1.23E-03 | 0.0111   |
| DYRK3     | 0.6        | 1.25E-03 | 0.0113   |

**Supplementary Table S12.** Top 20 upregulated genes in low vs. high *TEC* expression.

| Gene     | Log2 Ratio | p-Value  | q-Value  |
|----------|------------|----------|----------|
| TEC      | -1.32      | 4.12E-22 | 8.58E-18 |
| GOLGB1   | -0.6       | 2.34E-09 | 2.28E-05 |
| CDCP1    | -1.38      | 3.97E-09 | 2.28E-05 |
| IFIH1    | -0.95      | 4.53E-09 | 2.28E-05 |
| LACTB    | -1.05      | 5.47E-09 | 2.28E-05 |
| CASP1    | -1.48      | 9.17E-09 | 2.77E-05 |
| PARP9    | -1.04      | 9.69E-09 | 2.77E-05 |
| SLC8B1   | -0.92      | 1.06E-08 | 2.77E-05 |
| KLF3     | -0.7       | 2.45E-08 | 5.66E-05 |
| MANBA    | -0.83      | 3.02E-08 | 6.28E-05 |
| DGKG     | -1.05      | 3.57E-08 | 6.75E-05 |
| SERPINB8 | -1.14      | 7.50E-08 | 1.28E-04 |
| CCR1     | -0.83      | 8.45E-08 | 1.28E-04 |
| PARP14   | -1.06      | 8.79E-08 | 1.28E-04 |
| B4GALT4  | -0.76      | 9.72E-08 | 1.28E-04 |
| KLHL5    | -0.8       | 9.81E-08 | 1.28E-04 |
| SLC41A2  | -0.92      | 1.05E-07 | 1.29E-04 |
| SQOR     | -1.12      | 1.16E-07 | 1.34E-04 |
| TRIM14   | -0.95      | 1.31E-07 | 1.44E-04 |
| PLD1     | -1.19      | 1.40E-07 | 1.46E-04 |

**Supplementary Table S13.** Top 20 downregulated genes in low vs. high *TEC* expression.

| Gene      | Log2 Ratio | p-Value  | q-Value  |
|-----------|------------|----------|----------|
| CCT3      | 0.59       | 6.85E-06 | 1.22E-03 |
| AHCY      | 0.69       | 7.43E-06 | 1.29E-03 |
| MEX3A     | 0.68       | 3.28E-05 | 2.69E-03 |
| HMGN2P21  | 0.51       | 4.11E-05 | 2.98E-03 |
| RPL8      | 0.65       | 5.39E-05 | 3.49E-03 |
| RPS2      | 0.46       | 6.85E-05 | 3.88E-03 |
| OBSCN-AS1 | 0.55       | 1.37E-04 | 5.49E-03 |
| RPS18     | 0.53       | 1.57E-04 | 6.05E-03 |
| NPM1      | 0.51       | 1.73E-04 | 6.31E-03 |
| RPL13     | 0.44       | 1.83E-04 | 6.48E-03 |
| DLL3      | 1.13       | 2.05E-04 | 6.90E-03 |
| SOX8      | 0.64       | 2.38E-04 | 7.56E-03 |
| RPL13A    | 0.4        | 2.50E-04 | 7.75E-03 |
| MSI1      | 0.87       | 2.72E-04 | 8.15E-03 |
| RPLP1     | 0.47       | 3.26E-04 | 9.05E-03 |
| RPL23A    | 0.46       | 4.71E-04 | 0.0113   |
| RPS19     | 0.48       | 5.59E-04 | 0.0125   |
| TBCE      | 0.42       | 6.26E-04 | 0.0134   |
| RPL7A     | 0.43       | 6.33E-04 | 0.0134   |
| RPL12     | 0.46       | 6.85E-04 | 0.014    |

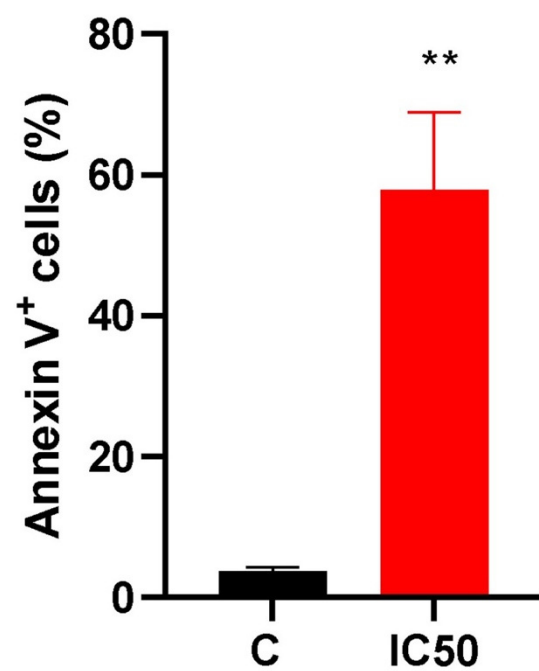

**Supplementary Figure S1.** Apoptosis detection by annexin V / PI staining method in SK-MEL-28 cells untreated and treated with IC50 dose of Ibrutinib. For flow cytometry analyzes, ten thousand events were recorded for each sample. Data are expressed as mean with SEM and analyzed by Unpaired student t-test. \*\*mean,  $p < 0.01$ .
